# Supplementary material
Source: publisher site journal article supplement (https://pubs.acs.org/publish/diversity_supplemental_info)
Supplement: Supplementary file 1 [file diversity_supplemental_info]

## Sheet: Geo Region Demographics
	ACS User Groups by Geographic Region, 2021-2023
		All Authors Submitting			All Authors Published			Corresponding Authors Submitting			Corresponding Authors Published			Invited Reviewers			Reviews Completed			Editors			EAB Members			Topic Editors			ECAB Members
	Geographic Region	2021	2022	2023	2021	2022	2023	2021	2022	2023	2021	2022	2023	2021	2022	2023	2021	2022	2023	2021	2022	2023	2021	2022	2023	2021	2022	2023	2021	2022	2023
	East Asia & Pacific	0.393254	0.411026	0.601016	0.201188	0.217225	0.528961	0.435944	0.435032	0.536763	0.433726	0.438443	0.478638	0.336019	0.329226	0.333728	0.363158	0.381919	0.390931	0.207908	0.208675	0.215772	0.220356	0.22168	0.235381	--	0.12069	0.139241	--	0.222222	0.264
	Europe & Central Asia	0.237971	0.226915	0.159002	0.296419	0.29568	0.193879	0.234749	0.230016	0.185142	0.229377	0.219814	0.213617	0.243785	0.260081	0.29151	0.302137	0.298201	0.254013	0.202806	0.213365	0.222344	0.220356	0.227	0.221134	--	0.275862	0.240506	--	0.194444	0.194
	Latin America & Caribbean	0.0199944	0.0172355	0.0171856	0.0240964	0.0230971	0.0141744	0.0284545	0.0254777	0.0209708	0.0249666	0.022594	0.016165	0.0211503	0.0239817	0.0250509	0.0141698	0.0122232	0.0207851	0.0114796	0.0128957	0.0164294	0.0174777	0.0221354	0.0249332	--	0.0344828	0.0379747	--	0.0138889	0.013
	Middle East & North Africa	0.0227973	0.0227143	0.0264626	0.0149365	0.0129979	0.0192993	0.0328837	0.0316083	0.0333933	0.0147613	0.016468	0.0217957	0.0295786	0.0300407	0.0255425	0.0147412	0.0142989	0.0222206	0.00892857	0.00820633	0.00766703	0.0154215	0.0133464	0.011873	--	0	0	--	0.0138889	0.009
	Oceania	0.0288704	0.0287638	0.010097	0.028305	0.0277726	0.0126093	0.0238239	0.0241242	0.0120513	0.0208966	0.0222647	0.0144992	0.0190299	0.0194501	0.0212822	0.0194264	0.0185655	0.0185904	0.0357143	0.0328253	0.0317634	0.0294722	0.0315755	0.032057	--	0.0172414	0.0253165	--	0.0324074	0.026
	South Asia	0.0274689	0.0279648	0.061424	0.0291302	0.0277726	0.0485892	0.0467754	0.044586	0.074755	0.026789	0.0285884	0.0588884	0.0434667	0.0485234	0.0416002	0.045252	0.0472786	0.0437769	0.0318878	0.0304807	0.0317634	0.043523	0.0439453	0.0451172	--	0	0.0253165	--	0.0509259	0.044
	Sub-Saharan Africa	0.00224236	0.00125556	0.00317115	0.00371348	0.00224425	0.00232887	0.00503322	0.00374204	0.00472076	0.00321954	0.0030301	0.00293269	0.00482375	0.00473523	0.00354809	0.00491372	0.00392066	0.0029066	0.00510204	0.007034	0.00657174	0.00822481	0.00813802	0.00801425	--	0.0172414	0.0126582	--	0.00462963	0.009
	United States & Canada	0.267402	0.264125	0.121642	0.402212	0.393211	0.180159	0.192336	0.205414	0.132204	0.246264	0.248798	0.193464	0.302147	0.283961	0.257737	0.236202	0.223593	0.246776	0.496173	0.486518	0.467689	0.445168	0.432943	0.42149	--	0.534483	0.518987	--	0.467593	0.441
	Corresponding Authors of Submitted Manuscripts by Geographic Region and Subject Area, 2021-2023
		Analytical			Biological & Medicinal			Chemical Engineering			Environmental			General			Inorganic			Materials			Nanoscience			Organic			Physical & Theoretical			Polymers & Macromolecules
	Geographic Region	2021	2022	2023	2021	2022	2023	2021	2022	2023	2021	2022	2023	2021	2022	2023	2021	2022	2023	2021	2022	2023	2021	2022	2023	2021	2022	2023	2021	2022	2023	2021	2022	2023
	East Asia & Pacific	0.508595	0.562759	0.57657	0.308531	0.353225	0.381369	0.572157	0.601592	0.599709	0.594487	0.652847	0.657153	0.450474	0.481239	0.475831	0.463056	0.510861	0.495123	0.525995	0.574953	0.57596	0.554112	0.605998	0.606963	0.442257	0.500681	0.511345	0.442195	0.491441	0.500667	0.420222	0.49629	0.508215
	Europe & Central Asia	0.18349	0.157581	0.143576	0.232376	0.214897	0.214378	0.144105	0.131525	0.126346	0.143906	0.123046	0.12313	0.194053	0.176678	0.180365	0.247969	0.224719	0.227739	0.198212	0.176012	0.172955	0.188615	0.162897	0.160538	0.236324	0.207119	0.200457	0.233757	0.212403	0.200439	0.232744	0.203792	0.198471
	Latin America & Caribbean	0.0211873	0.0182057	0.0173553	0.0370485	0.0312637	0.0282815	0.0319379	0.0249189	0.0224891	0.0287594	0.0203831	0.0196762	0.0200641	0.0179924	0.0171486	0.0181818	0.0161049	0.016008	0.0194999	0.0140048	0.0139796	0.0174262	0.0126188	0.0121906	0.0244942	0.020612	0.0192132	0.0265883	0.0209278	0.0196737	0.024974	0.0166529	0.0178949
	Middle East & North Africa	0.0437737	0.0427835	0.0392466	0.0448698	0.0424528	0.0376727	0.0568873	0.0519021	0.0490539	0.0304447	0.0251321	0.0246977	0.0424246	0.0480556	0.0460625	0.0230819	0.0259675	0.0270135	0.0310937	0.0311392	0.0318004	0.0286363	0.0282203	0.0281295	0.0303003	0.0300554	0.0290027	0.0356765	0.0321407	0.0310388	0.0449185	0.0428689	0.0406702
	Oceania	0.0174895	0.0137554	0.0113401	0.0192446	0.0162352	0.0171632	0.0125096	0.0119434	0.00946143	0.0145156	0.0123793	0.0109141	0.0149876	0.0126971	0.0103224	0.0143133	0.0128589	0.0122561	0.0175723	0.0151262	0.0118631	0.0172865	0.0146182	0.0112451	0.0139708	0.010987	0.0112534	0.0149216	0.0132671	0.0117526	0.0234131	0.0156636	0.0118757
	South Asia	0.0715571	0.0666532	0.0788877	0.0985901	0.0969724	0.0994171	0.0827451	0.0806547	0.0961426	0.0599652	0.0522384	0.0562103	0.0760863	0.0842681	0.101282	0.0767247	0.0729089	0.0922961	0.0683894	0.0673899	0.0783643	0.0622665	0.0632579	0.0707797	0.0840062	0.080632	0.0920403	0.0753265	0.0724557	0.0807181	0.0839403	0.0854081	0.0897999
	Sub-Saharan Africa	0.00429742	0.00475372	0.0051277	0.00730678	0.00592365	0.00550518	0.00594032	0.00575052	0.00713246	0.00549092	0.00464223	0.00420168	0.00604339	0.00677561	0.00810256	0.00361057	0.0031211	0.00412706	0.00203939	0.00200814	0.00248236	0.00185088	0.00163881	0.00212744	0.00480813	0.00444929	0.00512351	0.00325485	0.00278182	0.00331482	0.00190773	0.0016488	0.00195217
	United States & Canada	0.14961	0.133509	0.127897	0.252033	0.23903	0.216213	0.0937172	0.0917134	0.0896652	0.122431	0.109332	0.104017	0.195866	0.172294	0.160886	0.153063	0.133458	0.125438	0.137198	0.119367	0.112595	0.129806	0.110751	0.108027	0.163839	0.145464	0.131565	0.16828	0.154584	0.152396	0.167881	0.137675	0.131121
	Corresponding Authors of Published Manuscripts by Geographic Region and Subject Area, 2021-2023
		Analytical			Biological & Medicinal			Chemical Engineering			Environmental			General			Inorganic			Materials			Nanoscience			Organic			Physical & Theoretical			Polymers & Macromolecules
	Geographic Region	2021	2022	2023	2021	2022	2023	2021	2022	2023	2021	2022	2023	2021	2022	2023	2021	2022	2023	2021	2022	2023	2021	2022	2023	2021	2022	2023	2021	2022	2023	2021	2022	2023
	East Asia & Pacific	0.425603	0.466071	0.495901	0.240061	0.272318	0.291083	0.493499	0.498977	0.535492	0.49419	0.527574	0.569234	0.404433	0.422463	0.402785	0.384233	0.420577	0.45479	0.46888	0.525087	0.543985	0.489713	0.552983	0.574875	0.39543	0.438607	0.464184	0.347577	0.390187	0.412673	0.363597	0.424268	0.46406
	Europe & Central Asia	0.2255	0.208322	0.183285	0.28306	0.260715	0.262372	0.200935	0.191772	0.173939	0.194256	0.174837	0.159977	0.181303	0.190804	0.199669	0.304159	0.279219	0.27395	0.227148	0.202335	0.189008	0.223824	0.194432	0.180225	0.274787	0.250098	0.241307	0.290959	0.274949	0.252821	0.261458	0.235469	0.217615
	Latin America & Caribbean	0.0177014	0.0103323	0.0126951	0.0211755	0.0168127	0.0203081	0.026412	0.0255833	0.0178966	0.0135935	0.0163399	0.0159401	0.0224963	0.0171328	0.0195808	0.0142768	0.00903527	0.00941873	0.0146485	0.0113118	0.0103158	0.0128582	0.0107821	0.00948108	0.0127808	0.00964187	0.0119704	0.0234049	0.0173004	0.0191489	0.00785683	0.0101824	0.0118483
	Middle East & North Africa	0.0243715	0.0223401	0.0227453	0.0168539	0.0113663	0.0135387	0.0333198	0.0321326	0.0335813	0.0127165	0.00837418	0.00883426	0.0369938	0.0461268	0.047711	0.00993172	0.0122413	0.0113025	0.0181027	0.0166636	0.0187976	0.0175422	0.0147592	0.01583	0.00948877	0.0102322	0.00874026	0.0204914	0.0191575	0.0190564	0.0157137	0.0199406	0.021327
	Oceania	0.0236018	0.0223401	0.0169267	0.0237684	0.0217855	0.0252101	0.0182852	0.019648	0.0134728	0.0206095	0.0189951	0.0130593	0.0143309	0.0125934	0.0107557	0.0170701	0.0160303	0.0129171	0.0216209	0.0200085	0.0147286	0.0210323	0.0187362	0.0144756	0.0168474	0.0133806	0.0150105	0.0164125	0.01515	0.013876	0.0283719	0.0254561	0.0165877
	South Asia	0.0328374	0.0385367	0.0476065	0.0378133	0.0400189	0.0417834	0.0505892	0.0523946	0.0693746	0.0241175	0.028799	0.031112	0.0683219	0.0716064	0.0973525	0.0434513	0.0501312	0.0586652	0.0472078	0.0445174	0.0571379	0.0388501	0.034821	0.043596	0.0443455	0.0509642	0.0600418	0.0458386	0.0468185	0.0517114	0.0397206	0.0479423	0.0442338
	Sub-Saharan Africa	0.00102617	0.00167551	0.00211584	0.00280899	0.00284158	0.00210084	0.00426656	0.00388866	0.00522823	0.00285025	0.00285948	0.00192049	0.00616564	0.00776102	0.00827358	0.00434513	0.00262314	0.00269107	0.000767607	0.000729794	0.000859648	0.00064291	0.000707026	0.00033861	0.00213013	0.0021645	0.00171005	0.0012625	0.0018571	0.00157262	0.00130947	0.000424268	0.000789889
	United States & Canada	0.249359	0.230383	0.218725	0.37446	0.374142	0.343604	0.172694	0.175604	0.151015	0.237667	0.222222	0.199923	0.265956	0.231513	0.213872	0.222533	0.210143	0.176265	0.201625	0.179347	0.165167	0.195536	0.172779	0.161178	0.244191	0.224911	0.197036	0.254055	0.234581	0.22914	0.281973	0.236317	0.223539
	Reviewers Completing Reviews by Geographic Region and Subject Area, 2021-2023
		Analytical			Biological & Medicinal			Chemical Engineering			Environmental			General			Inorganic			Materials			Nanoscience			Organic			Physical & Theoretical			Polymers & Macromolecules
	Geographic Region	2021	2022	2023	2021	2022	2023	2021	2022	2023	2021	2022	2023	2021	2022	2023	2021	2022	2023	2021	2022	2023	2021	2022	2023	2021	2022	2023	2021	2022	2023	2021	2022	2023
	East Asia & Pacific	0.393254	0.411026	0.439424	0.201188	0.217225	0.231789	0.435944	0.435032	0.459594	0.433726	0.438443	0.475902	0.336019	0.329226	0.337964	0.363158	0.381919	0.39758	0.45011	0.464447	0.479605	0.465474	0.486097	0.506756	0.313151	0.32643	0.336779	0.335229	0.342619	0.358279	0.400433	0.414753	0.444762
	Europe & Central Asia	0.237971	0.226915	0.221022	0.296419	0.29568	0.29053	0.234749	0.230016	0.217003	0.229377	0.219814	0.20131	0.243785	0.260081	0.247871	0.302137	0.298201	0.288119	0.238409	0.231373	0.219855	0.232125	0.222491	0.207825	0.307465	0.306609	0.294847	0.303106	0.305193	0.294336	0.245945	0.24709	0.232063
	Latin America & Caribbean	0.0199944	0.0172355	0.0158262	0.0240964	0.0230971	0.0225065	0.0284545	0.0254777	0.0226856	0.0249666	0.022594	0.0210084	0.0211503	0.0239817	0.0250456	0.0141698	0.0122232	0.0137514	0.014881	0.0136118	0.0138765	0.0143887	0.0133791	0.0127875	0.017426	0.0165844	0.0172029	0.0201208	0.0169693	0.0174882	0.0115866	0.011167	0.0120635
	Middle East & North Africa	0.0227973	0.0227143	0.0225933	0.0149365	0.0129979	0.0157826	0.0328837	0.0316083	0.0314696	0.0147613	0.016468	0.0150766	0.0295786	0.0300407	0.0306733	0.0147412	0.0142989	0.0150715	0.0214077	0.0209665	0.0219801	0.0204776	0.0194901	0.0196703	0.0127741	0.0127012	0.0115789	0.0191795	0.017905	0.0191577	0.0179206	0.0182447	0.0177778
	Oceania	0.0288704	0.0287638	0.0229208	0.028305	0.0277726	0.0245611	0.0238239	0.0241242	0.0197067	0.0208966	0.0222647	0.0208848	0.0190299	0.0194501	0.0178463	0.0194264	0.0185655	0.0190319	0.021	0.0197865	0.0181858	0.0200354	0.020358	0.0181489	0.0173521	0.016908	0.0161277	0.0187873	0.0186705	0.0164448	0.0279623	0.0251651	0.0211111
	South Asia	0.028	0.0279648	0.0320891	0.0291302	0.0277726	0.0339933	0.0467754	0.044586	0.0536205	0.026789	0.0285884	0.027002	0.0434667	0.0485234	0.0556682	0.045252	0.0472786	0.0519252	0.0413534	0.0417684	0.0467789	0.0387441	0.0384741	0.0419489	0.0412021	0.0390745	0.0436688	0.0361233	0.0336835	0.0360616	0.025336	0.0303555	0.0269841
	Sub-Saharan Africa	0.00224236	0.00125556	0.00174634	0.00371348	0.00224425	0.0031752	0.00503322	0.00374204	0.00328445	0.00321954	0.0030301	0.00210084	0.00482375	0.00473523	0.00441087	0.00491372	0.00392066	0.00319032	0.00177527	0.0013996	0.00149064	0.00156473	0.00119327	0.00130411	0.00369194	0.00291239	0.00330825	0.00192187	0.00187131	0.00162778	0.00139039	0.000629129	0.00126984
	United States & Canada	0.267402	0.264125	0.244379	0.402212	0.393211	0.377662	0.192336	0.205414	0.192637	0.246264	0.248798	0.236715	0.302147	0.283961	0.280521	0.236202	0.223593	0.211331	0.211597	0.206647	0.198227	0.207191	0.198517	0.19156	0.286938	0.27878	0.276487	0.265532	0.263089	0.256605	0.269427	0.252595	0.243968

## Sheet: Race-Ethnicity Demographics
	ACS User Groups by Race/Ethincity, 2021-2023
		All Authors Submitting			All Authors Published			Corresponding Authors Submitting			Corresponding Authors Published			Invited Reviewers			Reviews Completed			Editors			EAB Members
	Race/Ethnicity	2021	2022	2023	2021	2022	2023	2021	2022	2023	2021	2022	2023	2021	2022	2023	2021	2022	2023	2021	2022	2023	2021	2022	2023
	African / Black	0.0164522	0.0180553	0.0198242	0.0125298	0.0153918	0.0178007	0.0153095	0.0178939	0.0187593	0.0107741	0.0156094	0.0144659	0.0144509	0.0148537	0.0180355	0.01514	0.0152347	0.0177191	0.0107143	0.0126183	0.0131579	0.0182796	0.0168776	0.0152284
	African American / Black	0.00576736	0.00501253	0.00491058	0.00775656	0.00690299	0.00600379	0.0057688	0.00637598	0.00618205	0.00837989	0.008635	0.00778932	0.007386	0.00690173	0.00760173	0.00813777	0.00620018	0.00735156	0.0107143	0.0126183	0.0131579	0.0204301	0.021097	0.0192893
	Caribbean	0.00382467	0.0030689	0.0024856	0.00462411	0.00429104	0.00315989	0.00399379	0.00308515	0.00255809	0.00438947	0.00498173	0.00333828	0.00481696	0.00420105	0.00476971	0.00510977	0.0040744	0.00471254	0.00714286	0.00630915	0.00526316	0.00645161	0.00632911	0.00609137
	East Asian	0.430124	0.452253	0.443225	0.399761	0.414646	0.416474	0.366541	0.38297	0.385845	0.371508	0.367984	0.372033	0.280026	0.27877	0.286779	0.289932	0.295837	0.308388	0.278571	0.274448	0.281579	0.219355	0.220464	0.231472
	Indigenous	0.00443176	0.00404071	0.00315247	0.00298329	0.00550373	0.00337055	0.0028844	0.00411353	0.00362396	0.00199521	0.00464962	0.00445104	0.00385356	0.00300075	0.00387539	0.00435276	0.00372011	0.00395853	0.00357143	0	0	0.00322581	0.00316456	0.00304569
	Latino or Hispanic	0.0535454	0.0494604	0.0502577	0.0495227	0.0530784	0.0501369	0.0543599	0.0503908	0.0528672	0.0438947	0.0504816	0.0537834	0.0611753	0.0606152	0.0609629	0.0599924	0.0605846	0.0590009	0.05	0.0504732	0.0578947	0.0569892	0.0590717	0.057868
	Middle Eastern / North African	0.0295046	0.0313027	0.0318885	0.0237172	0.0265858	0.0280177	0.0308409	0.0357877	0.0370923	0.0211492	0.0292262	0.027819	0.0244059	0.0256564	0.0262334	0.0221423	0.0235607	0.0218662	0.0214286	0.0189274	0.0184211	0.0150538	0.0147679	0.0152284
	South Asian	0.0800146	0.0793821	0.0864504	0.0656325	0.0657649	0.0752054	0.0714444	0.0837104	0.0867619	0.056664	0.0627698	0.0764095	0.0571612	0.0588147	0.0645402	0.0554504	0.0577502	0.065787	0.0392857	0.0347003	0.0421053	0.0494624	0.0506329	0.0517766
	Southeast Asian	0.0523919	0.0533988	0.0519551	0.0423628	0.0477612	0.049189	0.0470379	0.0473056	0.0460456	0.0315243	0.0375291	0.0378338	0.0324342	0.0364591	0.0348785	0.0325511	0.038264	0.0344958	0.0214286	0.0189274	0.0184211	0.0236559	0.0232068	0.0253807
	White	0.275134	0.250882	0.247348	0.360382	0.320896	0.302928	0.363435	0.326615	0.319974	0.421389	0.388907	0.372033	0.48025	0.476819	0.461619	0.47483	0.46395	0.450141	0.521429	0.536278	0.515789	0.590323	0.586498	0.575635
	Self-describe	0.0475959	0.0488466	0.0475902	0.0390811	0.0475746	0.0517169	0.0401598	0.0448375	0.0471115	0.0339186	0.0405181	0.0404303	0.0353243	0.0378095	0.0393501	0.0352006	0.0363153	0.0361923	0.0357143	0.0347003	0.0315789	0.0204301	0.0221519	0.0243655
	Prefer not to say	0.052999	0.0542172	0.0575932	0.0429594	0.0477612	0.0487676	0.0477036	0.0508021	0.0411426	0.0403033	0.0454998	0.0456231	0.0526654	0.0508627	0.0491877	0.0522332	0.0488928	0.0465598	0.0428571	0.0378549	0.0394737	0.0397849	0.0379747	0.0345178
	Corresponding Authors of Submitted Manuscripts by Race/Ethnicity and Subject Area, 2021-2023
		Analytical			Biological & Medicinal			Chemical Engineering			Environmental			General			Inorganic			Materials			Nanoscience			Organic			Physical & Theoretical			Polymers & Macromolecules
	Race/Ethnicity	2021	2022	2023	2021	2022	2023	2021	2022	2023	2021	2022	2023	2021	2022	2023	2021	2022	2023	2021	2022	2023	2021	2022	2023	2021	2022	2023	2021	2022	2023	2021	2022	2023
	African / Black	0.0182186	0.0252918	0.0115607	0.0181488	0.0258621	0.02693	0.0146843	0.0183616	0.0236337	0.0188442	0.0228571	0.0303738	0.0196399	0.0240964	0.0199262	0.00369686	0.00731261	0.00562852	0.00977729	0.00999001	0.0115063	0.00757576	0.00912647	0.0111343	0.0150188	0.0138889	0.0155039	0.0118812	0.0121376	0.0141643	0.00291545	0.0026455	0.00539084
	African American / Black	0.00202429	0.00583658	0.00192678	0.00725953	0.00344828	0.00359066	0.00440529	0.00423729	0.00443131	0.00376884	0.00457143	0.00584112	0.0114566	0.00992204	0.0095941	0.00739372	0.00914077	0.00375235	0.00597501	0.00799201	0.00470711	0.00688705	0.00782269	0.00487126	0.00625782	0.00378788	0.00516796	0.00528053	0.00606878	0.00708215	0.00291545	0.015873	0.00539084
	Caribbean	0.00202429	0.00389105	0.00192678	0.00907441	0.00517241	0.005386	0.00440529	0.00423729	0	0.00251256	0.00114286	0.00350467	0.00490998	0.00354359	0.00295203	0	0.00548446	0	0.00271592	0.000999001	0.00104603	0.00344353	0.00130378	0.00139179	0.00625782	0.00505051	0.00129199	0.0039604	0.00269724	0.00354108	0.00291545	0.0026455	0
	East Asian	0.388664	0.410506	0.431599	0.268603	0.275862	0.283662	0.409692	0.392655	0.387001	0.454774	0.460571	0.449766	0.369067	0.379164	0.369742	0.340111	0.387569	0.348968	0.425312	0.440559	0.437762	0.449036	0.468057	0.464161	0.415519	0.426768	0.421189	0.375578	0.378962	0.392351	0.358601	0.417989	0.380054
	Indigenous	0.00202429	0	0.00385356	0.00907441	0.00689655	0.00359066	0.00146843	0.00847458	0.0014771	0	0.00571429	0.00350467	0.00327332	0.00637845	0.00442804	0.00184843	0.00182815	0.00187617	0.000543183	0.001998	0.00261506	0.000688705	0.00260756	0.00208768	0.00750939	0.00631313	0.00258398	0.00132013	0.000674309	0.00212465	0.00291545	0.0026455	0.00539084
	Latino or Hispanic	0.034413	0.0272374	0.0500963	0.076225	0.0568966	0.0502693	0.0602056	0.069209	0.0590842	0.048995	0.0582857	0.0595794	0.0499182	0.0517364	0.0487085	0.0406654	0.0292505	0.0375235	0.0429115	0.0354645	0.0449791	0.0365014	0.0345502	0.0431454	0.0425532	0.0315657	0.0258398	0.0508251	0.0472016	0.0509915	0.0524781	0.037037	0.0485175
	Middle Eastern / North African	0.0263158	0.0564202	0.0385356	0.0344828	0.0448276	0.0341113	0.0264317	0.0480226	0.0457903	0.0226131	0.0228571	0.0338785	0.0376432	0.0354359	0.0405904	0.0277264	0.023766	0.0375235	0.0293319	0.035964	0.0366109	0.0282369	0.0345502	0.0361865	0.0225282	0.0252525	0.0258398	0.0323432	0.028321	0.029745	0.0174927	0.021164	0.0350404
	South Asian	0.0769231	0.0719844	0.0963391	0.0725953	0.101724	0.0915619	0.0969163	0.118644	0.107829	0.0766332	0.101714	0.0817757	0.0728314	0.0992204	0.098893	0.0702403	0.0621572	0.0844278	0.0744161	0.0834166	0.0899582	0.0716253	0.077575	0.0835073	0.068836	0.0782828	0.0788114	0.0772277	0.0795684	0.0856941	0.0670554	0.0793651	0.083558
	Southeast Asian	0.0445344	0.0447471	0.0423892	0.0326679	0.0396552	0.043088	0.0704846	0.0579096	0.0576071	0.0603015	0.0525714	0.0689252	0.0466448	0.0496102	0.0457565	0.038817	0.0566728	0.0450281	0.0472569	0.0539461	0.0496862	0.0461433	0.0541069	0.0466249	0.0375469	0.0454545	0.0465116	0.0415842	0.0445044	0.0446176	0.0408163	0.031746	0.0485175
	White	0.350202	0.305447	0.27553	0.451906	0.408621	0.436266	0.251101	0.241525	0.254062	0.273869	0.227429	0.23014	0.36743	0.315379	0.326937	0.428835	0.38574	0.386492	0.318305	0.289211	0.273536	0.30303	0.274446	0.261656	0.34418	0.323232	0.338501	0.357756	0.356709	0.32153	0.41691	0.365079	0.358491
	Self-describe	0.0506073	0.0622568	0.0327553	0.0490018	0.0586207	0.02693	0.0631424	0.0564972	0.0546529	0.0565327	0.0457143	0.0478972	0.0400982	0.0503189	0.0383764	0.038817	0.0329068	0.0281426	0.0412819	0.044955	0.0392259	0.0433884	0.0449804	0.0354906	0.0463079	0.0416667	0.0271318	0.0442244	0.0485502	0.0403683	0.0437318	0.0529101	0.0242588
	Prefer not to say	0.0263158	0.0311284	0.0578035	0.0453721	0.0413793	0.037702	0.0396476	0.0437853	0.0546529	0.0326633	0.048	0.0432243	0.0343699	0.0389794	0.0435424	0.0443623	0.0438757	0.0562852	0.0401955	0.0424575	0.0475941	0.0406336	0.0423729	0.0473208	0.0513141	0.0530303	0.0490956	0.0422442	0.0411328	0.0552408	0.03207	0.026455	0.0377358
	Corresponding Authors of Published Manuscripts by Race/Ethnicity and Subject Area, 2021-2023
		Analytical			Biological & Medicinal			Chemical Engineering			Environmental			General			Inorganic			Materials			Nanoscience			Organic			Physical & Theoretical			Polymers & Macromolecules
	Race/Ethnicity	2021	2022	2023	2021	2022	2023	2021	2022	2023	2021	2022	2023	2021	2022	2023	2021	2022	2023	2021	2022	2023	2021	2022	2023	2021	2022	2023	2021	2022	2023	2021	2022	2023
	African / Black	0.0182186	0.0202429	0.00456621	0.0181488	0.0204678	0.0162866	0.0146843	0.0189873	0.0100334	0.0188442	0.0151057	0.0266667	0.0196399	0.0339463	0.0216049	0.00369686	0	0.00348432	0.00977729	0.0076555	0.00432432	0.00757576	0.00712251	0.00654664	0.0150188	0.0168421	0.0190275	0.0118812	0.00839329	0.012837	0.00291545	0	0
	African American / Black	0.00202429	0.00404858	0.00456621	0.00725953	0	0.00651466	0.00440529	0.00632911	0.00334448	0.00376884	0.00906344	0.01	0.0114566	0.0183876	0.00925926	0.00739372	0.012987	0.00696864	0.00597501	0.0105263	0.00540541	0.00688705	0.011396	0.00818331	0.00625782	0.00842105	0.012685	0.00528053	0.0059952	0.00898588	0.00291545	0.0194175	0.010929
	Caribbean	0.00202429	0	0.00456621	0.00907441	0.0116959	0.00325733	0.00440529	0.00632911	0	0.00251256	0.00302115	0.00666667	0.00490998	0.00565771	0.00462963	0	0.00649351	0	0.00271592	0.00191388	0.00108108	0.00344353	0.002849	0.00163666	0.00625782	0.00842105	0.00422833	0.0039604	0.00479616	0.00513479	0.00291545	0.00485437	0
	East Asian	0.388664	0.384615	0.410959	0.268603	0.236842	0.260586	0.409692	0.348101	0.384615	0.454774	0.444109	0.41	0.369067	0.339463	0.328704	0.340111	0.311688	0.351916	0.425312	0.417225	0.438919	0.449036	0.435897	0.469722	0.415519	0.412632	0.40592	0.375578	0.31295	0.32991	0.358601	0.393204	0.398907
	Indigenous	0.00202429	0.00404858	0	0.00907441	0.0146199	0.00651466	0.00146843	0.0126582	0.00668896	0	0.00302115	0.00666667	0.00327332	0.00707214	0.00462963	0.00184843	0	0	0.000543183	0	0.00216216	0.000688705	0	0	0.00750939	0.00631579	0.00634249	0.00132013	0.00119904	0.0012837	0.00291545	0	0.00546448
	Latino or Hispanic	0.034413	0.0323887	0.0593607	0.076225	0.0672515	0.0684039	0.0602056	0.0601266	0.0668896	0.048995	0.0574018	0.0566667	0.0499182	0.0452617	0.066358	0.0406654	0.0292208	0.0348432	0.0429115	0.0363636	0.0389189	0.0365014	0.039886	0.0343699	0.0425532	0.0421053	0.0359408	0.0508251	0.0479616	0.0564827	0.0524781	0.0291262	0.0546448
	Middle Eastern / North African	0.0263158	0.0445344	0.0319635	0.0344828	0.0204678	0.0130293	0.0264317	0.0379747	0.0468227	0.0226131	0.0060423	0.04	0.0376432	0.0424328	0.037037	0.0277264	0.0162338	0.0348432	0.0293319	0.030622	0.0205405	0.0282369	0.0299145	0.0196399	0.0225282	0.0168421	0.0147992	0.0323432	0.0335731	0.0192555	0.0174927	0.00970874	0.0163934
	South Asian	0.0769231	0.048583	0.0547945	0.0725953	0.0497076	0.0390879	0.0969163	0.0791139	0.100334	0.0766332	0.0725076	0.0733333	0.0728314	0.0777935	0.0987654	0.0702403	0.0681818	0.0731707	0.0744161	0.061244	0.0778378	0.0716253	0.045584	0.0638298	0.068836	0.0568421	0.0739958	0.0772277	0.059952	0.0706033	0.0670554	0.0436893	0.0601093
	Southeast Asian	0.0445344	0.0404858	0.0273973	0.0326679	0.0380117	0.0325733	0.0704846	0.0506329	0.0367893	0.0603015	0.0362538	0.0533333	0.0466448	0.0367751	0.0401235	0.038817	0.0487013	0.0348432	0.0472569	0.0392344	0.0378378	0.0461433	0.0327635	0.0360065	0.0375469	0.0357895	0.0274841	0.0415842	0.0347722	0.0359435	0.0408163	0.0194175	0.0218579
	White	0.350202	0.376518	0.351598	0.451906	0.523392	0.537459	0.251101	0.35443	0.317726	0.273869	0.326284	0.306667	0.36743	0.380481	0.358025	0.428835	0.470779	0.425087	0.318305	0.362679	0.331892	0.30303	0.371795	0.320786	0.34418	0.381053	0.389006	0.357756	0.466427	0.422336	0.41691	0.470874	0.453552
	Self-describe	0.0506073	0.0566802	0.0456621	0.0490018	0.0526316	0.0456026	0.0631424	0.056962	0.0535117	0.0565327	0.0574018	0.0566667	0.0400982	0.0381895	0.0385802	0.038817	0.0357143	0.0278746	0.0412819	0.0401914	0.0410811	0.0433884	0.039886	0.0327332	0.0463079	0.0357895	0.0274841	0.0442244	0.0371703	0.0462131	0.0437318	0.0242718	0.0273224
	Prefer not to say	0.0263158	0.0202429	0.0456621	0.0453721	0.0380117	0.0358306	0.0396476	0.0221519	0.0401338	0.0326633	0.0271903	0.0166667	0.0343699	0.0381895	0.0447531	0.0443623	0.0519481	0.0418118	0.0401955	0.0411483	0.0410811	0.0406336	0.0384615	0.0425532	0.0513141	0.0547368	0.05074	0.0422442	0.0395683	0.0487805	0.03207	0.038835	0.00546448
	Reviewers Completing Reviews by Race/Ethnicity and Subject Area, 2021-2023
		Analytical			Biological & Medicinal			Chemical Engineering			Environmental			General			Inorganic			Materials			Nanoscience			Organic			Physical & Theoretical			Polymers & Macromolecules
	Race/Ethnicity	2021	2022	2023	2021	2022	2023	2021	2022	2023	2021	2022	2023	2021	2022	2023	2021	2022	2023	2021	2022	2023	2021	2022	2023	2021	2022	2023	2021	2022	2023	2021	2022	2023
	African / Black	0.00846024	0.0136054	0.013913	0.0200472	0.0179775	0.0245796	0.0186698	0.0138249	0.0242494	0.0187891	0.0192837	0.0224261	0.0108211	0.0165198	0.0186969	0.00421348	0.00562588	0.0056899	0.00948767	0.0121457	0.0117763	0.00914634	0.00956938	0.0110318	0.0121845	0.0133571	0.0104662	0.00929152	0.00985507	0.0109957	0.00625	0.00622407	0.00442478
	African American / Black	0.00507614	0.0085034	0.00695652	0.0117925	0.00561798	0.00517464	0.00700117	0.00806452	0.00808314	0.00730689	0.00826446	0.0101937	0.0108211	0.00770925	0.00963173	0.00702247	0.00703235	0.0056899	0.0085389	0.00539811	0.00490677	0.00914634	0.00478469	0.0045425	0.00522193	0.00712378	0.00570885	0.00522648	0.00463768	0.00366524	0.0145833	0.00622407	0.00884956
	Caribbean	0.00507614	0.0085034	0.00521739	0.00825472	0.00898876	0.00905563	0.00700117	0.00460829	0.0034642	0.00208768	0.00275482	0.00407747	0.00445576	0.0027533	0.00396601	0.00140449	0.00140647	0.00142248	0.0028463	0.00269906	0.00343474	0.00304878	0.00239234	0.00129786	0.00435161	0.00445236	0.00285442	0.00232288	0.00347826	0.00549786	0	0.00414938	0.00442478
	East Asian	0.329949	0.329932	0.356522	0.21934	0.231461	0.244502	0.343057	0.33871	0.381062	0.341336	0.337006	0.390418	0.252069	0.27478	0.294618	0.299157	0.320675	0.318634	0.364326	0.377418	0.387144	0.362195	0.395335	0.397794	0.290688	0.293856	0.326356	0.292102	0.307246	0.313378	0.347917	0.373444	0.365044
	Indigenous	0.00338409	0	0.00347826	0.00353774	0.00337079	0.00646831	0.00466744	0.00345622	0.00577367	0.00730689	0.00734619	0.00611621	0.00381922	0.00330396	0.00453258	0.00561798	0.00421941	0.00426743	0.00426945	0.00404858	0.00343474	0.00487805	0.00358852	0.00259572	0.00522193	0.00534283	0.0038059	0.00406504	0.00405797	0.00305437	0.00416667	0.00414938	0.00442478
	Latino or Hispanic	0.0558376	0.0629252	0.0486957	0.0636792	0.0550562	0.0633894	0.0595099	0.0737327	0.0669746	0.0803758	0.0762167	0.0754332	0.060471	0.0578194	0.0577904	0.0519663	0.0407876	0.0455192	0.0493359	0.0472335	0.0397448	0.0493902	0.0436603	0.036989	0.0365535	0.0427427	0.0428164	0.0487805	0.0498551	0.0513134	0.05	0.0435685	0.0442478
	Middle Eastern / North African	0.0186125	0.0153061	0.0191304	0.0224057	0.0157303	0.0129366	0.0186698	0.031106	0.0242494	0.0146138	0.0165289	0.0152905	0.0222788	0.0214758	0.0249292	0.0182584	0.0140647	0.00995733	0.0213472	0.0251912	0.0245339	0.0189024	0.0227273	0.0240104	0.0156658	0.0186999	0.0123692	0.0209059	0.0255072	0.0164936	0.01875	0.0165975	0.00884956
	South Asian	0.035533	0.0391156	0.0521739	0.0365566	0.041573	0.0426908	0.0700117	0.0725806	0.0704388	0.059499	0.0606061	0.0550459	0.050923	0.0638767	0.0679887	0.0491573	0.0576653	0.0611664	0.0597723	0.0643275	0.0711482	0.0573171	0.0639952	0.0694354	0.0504787	0.0454141	0.0532826	0.0511034	0.0521739	0.0494808	0.0395833	0.0456432	0.0553097
	Southeast Asian	0.0236887	0.0221088	0.0365217	0.0165094	0.0224719	0.0245796	0.0385064	0.0299539	0.0427252	0.0365344	0.0422406	0.0366972	0.0299173	0.0319383	0.0339943	0.0210674	0.0309423	0.0384068	0.0355787	0.0458839	0.0377821	0.0347561	0.0454545	0.036989	0.0261097	0.0276046	0.0247383	0.0307782	0.0313043	0.0311546	0.0291667	0.0311203	0.0243363
	White	0.480541	0.477891	0.424348	0.590802	0.593258	0.570505	0.407235	0.408986	0.352194	0.416493	0.412305	0.373089	0.521324	0.49174	0.469122	0.505618	0.481013	0.475107	0.404649	0.381916	0.374387	0.407317	0.373206	0.372485	0.534378	0.508459	0.490961	0.506388	0.477101	0.481979	0.447917	0.437759	0.446903
	Self-describe	0.0456853	0.0391156	0.0417391	0.0542453	0.0404494	0.0375162	0.0443407	0.0380184	0.0404157	0.0469729	0.0541781	0.0417941	0.0432845	0.0407489	0.0430595	0.0491573	0.0421941	0.0455192	0.0517078	0.048583	0.048577	0.052439	0.0466507	0.0447761	0.0478677	0.0454141	0.0428164	0.0481998	0.053913	0.0470373	0.03125	0.0394191	0.039823
	Prefer not to say	0.0321489	0.0255102	0.0295652	0.0271226	0.0292135	0.0245796	0.0303384	0.0345622	0.0265589	0.0323591	0.030303	0.0275229	0.0362826	0.032489	0.0351275	0.0365169	0.0323488	0.0398293	0.0379507	0.0373369	0.0392542	0.0408537	0.0382775	0.0408825	0.0304613	0.0382903	0.036156	0.0354239	0.0411594	0.0390959	0.0520833	0.033195	0.0287611

## Sheet: Gender Demographics
	ACS User Groups by Gender, 2021-2023
		All Authors Submitting			All Authors Published			Corresponding Authors Submitting			Corresponding Authors Published			Invited Reviewers			Reviews Completed			Editors			EAB Members			Topic Editors			ECAB Members
	Gender	2021	2022	2023	2021	2022	2023	2021	2022	2023	2021	2022	2023	2021	2022	2023	2021	2022	2023	2021	2022	2023	2021	2022	2023	2021	2022	2023	2021	2022	2023
	Man	0.666264	0.64988	0.657961	0.703472	0.66143	0.668344	0.731518	0.720978	0.724219	0.735939	0.721927	0.73037	0.722213	0.729204	0.721453	0.735939	0.729204	0.731827	0.6393	0.6038	0.5932	0.5754	0.5761	0.57	--	0.392	0.368421	--	0.537	0.568
	Woman	0.310174	0.32629	0.317853	0.272836	0.313284	0.304918	0.246127	0.255804	0.255582	0.242521	0.252824	0.247407	0.253408	0.246018	0.254131	0.242521	0.246018	0.245198	0.3393	0.3742	0.3858	0.4073	0.4049	0.412	--	0.565	0.605263	--	0.463	0.432
	Self-describe and Nonbinary	0.00894152	0.00977647	0.0088661	0.00700343	0.0101329	0.00975149	0.00531208	0.0053421	0.00361471	0.00279218	0.00531561	0.0037037	0.00545309	0.0060177	0.00610392	0.00279218	0.0060177	0.00527307	0	0	0	0.0011	0.0011	0.001	--	0	0	--	0	0
	Prefer not to say	0.0147414	0.0141555	0.0154403	0.016987	0.0152459	0.0170913	0.0170429	0.018081	0.0165852	0.0187475	0.0199336	0.0181481	0.0189254	0.0189381	0.0184606	0.0187475	0.0189381	0.0178908	0.0214	0.022	0.021	0.0162	0.018	0.017	--	0.044	0.0263158	--	0	0
	Corresponding Authors of Submitted Manuscripts by Gender and Subject Area, 2021-2023
		Analytical			Biological & Medicinal			Chemical Engineering			Environmental			General			Inorganic			Materials			Nanoscience			Organic			Physical & Theoretical			Polymers & Macromolecules
	Gender	2021	2022	2023	2021	2022	2023	2021	2022	2023	2021	2022	2023	2021	2022	2023	2021	2022	2023	2021	2022	2023	2021	2022	2023	2021	2022	2023	2021	2022	2023	2021	2022	2023
	Man	0.780769	0.753398	0.746479	0.649374	0.671848	0.687273	0.777941	0.784507	0.763504	0.715116	0.689852	0.714643	0.752395	0.746988	0.752249	0.714286	0.745421	0.719557	0.727415	0.727046	0.731892	0.738194	0.736808	0.742466	0.802581	0.77904	0.78625	0.743808	0.734997	0.765677	0.679245	0.71164	0.72093
	Woman	0.198077	0.236893	0.241449	0.329159	0.300518	0.285455	0.204412	0.195775	0.223358	0.27093	0.288483	0.262829	0.228445	0.236003	0.22731	0.261278	0.227106	0.252768	0.253786	0.250499	0.247568	0.24375	0.241042	0.235616	0.179355	0.195707	0.19125	0.233546	0.238705	0.213201	0.301887	0.26455	0.258721
	Self-describe and Nonbinary	0.00384615	0.0038835	0.00201207	0.00536673	0.00690846	0.00727273	0.00441176	0.0056338	0.00437956	0.00348837	0.00114025	0.00500626	0	0.0042523	0.00490597	0.0018797	0.0018315	0.00553506	0.00313316	0.00449102	0.00378378	0.00277778	0.00456026	0.00410959	0.00129032	0.00378788	0.0025	0.00283086	0.00539447	0.00462046	0.00269542	0	0
	Prefer not to say	0.0173077	0.00582524	0.0100604	0.0161002	0.0207254	0.02	0.0132353	0.0140845	0.00875912	0.0104651	0.0205245	0.0175219	0.0198968	0.0134656	0.0155356	0.0225564	0.025641	0.0221402	0.0156658	0.0179641	0.0167568	0.0152778	0.0175896	0.0178082	0.0167742	0.0214646	0.02	0.019816	0.0209036	0.0165017	0.0161725	0.0238095	0.0203488
	Corresponding Authors of Published Manuscripts by Gender and Subject Area, 2021-2023
		Analytical			Biological & Medicinal			Chemical Engineering			Environmental			General			Inorganic			Materials			Nanoscience			Organic			Physical & Theoretical			Polymers & Macromolecules
	Gender	2021	2022	2023	2021	2022	2023	2021	2022	2023	2021	2022	2023	2021	2022	2023	2021	2022	2023	2021	2022	2023	2021	2022	2023	2021	2022	2023	2021	2022	2023	2021	2022	2023
	Man	0.764706	0.744939	0.763636	0.695502	0.662757	0.669903	0.791822	0.768987	0.784053	0.732852	0.725076	0.717608	0.717842	0.68272	0.736518	0.721649	0.705882	0.723776	0.723586	0.732314	0.721382	0.726859	0.754986	0.73366	0.780488	0.772632	0.820296	0.734332	0.72389	0.717587	0.715054	0.705314	0.699454
	Woman	0.21267	0.246964	0.204545	0.273356	0.307918	0.300971	0.204461	0.21519	0.196013	0.252708	0.253776	0.282392	0.259336	0.29745	0.241911	0.254296	0.264706	0.244755	0.254002	0.239006	0.25486	0.247344	0.222222	0.243464	0.190687	0.197895	0.158562	0.247956	0.242497	0.252888	0.258065	0.2657	0.284153
	Self-describe and Nonbinary	0.00452489	0	0.00454545	0.00346021	0.00879765	0.00970874	0.00371747	0.00949367	0.00332226	0	0.00906344	0	0.00414938	0.00424929	0.00154083	0	0	0.0034965	0.00213447	0.00573614	0.00323974	0.00151745	0.00569801	0.00163399	0.00221729	0.00421053	0	0.00408719	0.00480192	0.00513479	0	0	0
	Prefer not to say	0.0180995	0.00809717	0.0272727	0.0276817	0.0205279	0.0194175	0	0.00632911	0.0166113	0.0144404	0.0120846	0	0.0186722	0.0155807	0.0200308	0.024055	0.0294118	0.027972	0.0202775	0.0229446	0.0205184	0.0242792	0.017094	0.0212418	0.0266075	0.0252632	0.0211416	0.013624	0.0288115	0.0243902	0.0268817	0.0289855	0.0163934
	Reviewers Completing Reviews by Gender and Subject Area, 2021-2023
		Analytical			Biological & Medicinal			Chemical Engineering			Environmental			General			Inorganic			Materials			Nanoscience			Organic			Physical & Theoretical			Polymers & Macromolecules
	Gender	2021	2022	2023	2021	2022	2023	2021	2022	2023	2021	2022	2023	2021	2022	2023	2021	2022	2023	2021	2022	2023	2021	2022	2023	2021	2022	2023	2021	2022	2023	2021	2022	2023
	Man	0.72758	0.746599	0.787826	0.679245	0.701124	0.694194	0.787879	0.788018	0.797921	0.73257	0.715201	0.741081	0.723458	0.730621	0.736693	0.755618	0.751055	0.764205	0.765847	0.756295	0.762604	0.781155	0.769277	0.780583	0.76087	0.780249	0.777778	0.760139	0.756083	0.760073	0.709544	0.739669	0.738938
	Woman	0.245347	0.234694	0.191304	0.300708	0.276404	0.27871	0.191142	0.192396	0.185912	0.245578	0.262821	0.244648	0.251113	0.245739	0.242356	0.212079	0.223629	0.210227	0.207663	0.219874	0.218796	0.190881	0.207412	0.201294	0.214783	0.192171	0.20038	0.213789	0.214368	0.213065	0.255187	0.225207	0.225664
	Self-describe and Nonbinary	0.00338409	0.00510204	0.00695652	0.00353774	0.00449438	0.00516129	0.0034965	0.00460829	0.00461894	0.00312175	0.00732601	0.0030581	0.00317864	0.00384827	0.00283126	0.00280899	0.00140647	0.00284091	0.00614948	0.00539568	0.00342633	0.00607903	0.00358637	0.0038835	0.0026087	0.00266904	0.000949668	0.00405562	0.00695249	0.003663	0.00622407	0.00619835	0.00221239
	Prefer not to say	0.0236887	0.0136054	0.013913	0.0165094	0.0179775	0.0219355	0.0174825	0.014977	0.0115473	0.0187305	0.014652	0.011213	0.0222505	0.0197911	0.01812	0.0294944	0.02391	0.0227273	0.0203406	0.0188849	0.0156632	0.0218845	0.019725	0.0148867	0.0217391	0.024911	0.0208927	0.0220162	0.0225956	0.0238095	0.0290456	0.0289256	0.0331858

## Sheet: Career Stage Demographics
	ACS User Groups by Career Stage, 2021-2023
		All Authors Submitting			All Authors Published			Corresponding Authors Submitting			Corresponding Authors Published			Invited Reviewers			Reviews Completed			Editors			EAB Members
	Time Since Doctorate	2021	2022	2023	2021	2022	2023	2021	2022	2023	2021	2022	2023	2021	2022	2023	2021	2022	2023	2021	2022	2023	2021	2022	2023
	0-10 years	0.516855	0.53929	0.509897	0.401617	0.491113	0.474517	0.286222	0.324566	0.349502	0.199912	0.260495	0.288954	0.228911	0.253825	0.270977	0.233841	0.26721	0.279022	0.004	0.0333333	0.0575342	0.073	0.078022	0.0933192
	11-20 years	0.245074	0.238723	0.257872	0.291009	0.255507	0.261863	0.377823	0.371139	0.363544	0.402021	0.383808	0.371273	0.334792	0.335088	0.332511	0.342939	0.34012	0.345564	0.265	0.323333	0.369863	0.42	0.424176	0.431601
	21-30 years	0.140542	0.132	0.140801	0.183754	0.150235	0.16	0.209845	0.191361	0.182027	0.251757	0.220015	0.209996	0.236787	0.226189	0.221948	0.231165	0.221447	0.21704	0.439	0.4	0.383562	0.311	0.310989	0.303287
	31+ years	0.0975293	0.0905069	0.0914305	0.123	0.103144	0.102988	0.12611	0.112934	0.104927	0.146309	0.135682	0.129777	0.19951	0.184899	0.174	0.192054	0.171224	0.158375	0.292	0.243333	0.189041	0.196	0.186813	0.171792
	Corresponding Authors of Submitted Manuscripts by Career Stage and Subject Area, 2021-2023
		Analytical			Biological & Medicinal			Chemical Engineering			Environmental			General			Inorganic			Materials			Nanoscience			Organic			Physical & Theoretical			Polymers & Macromolecules
	Time Since Doctorate	2021	2022	2023	2021	2022	2023	2021	2022	2023	2021	2022	2023	2021	2022	2023	2021	2022	2023	2021	2022	2023	2021	2022	2023	2021	2022	2023	2021	2022	2023	2021	2022	2023
	0-10 years	0.259346	0.326389	0.419431	0.176707	0.201195	0.247379	0.335135	0.342059	0.404022	0.329323	0.367263	0.416303	0.216418	0.26764	0.293118	0.206383	0.240664	0.253829	0.298758	0.34316	0.350866	0.279343	0.326468	0.348251	0.197203	0.218884	0.252907	0.270412	0.293843	0.329805	0.236422	0.268293	0.311526
	11-20 years	0.404206	0.395833	0.317536	0.413655	0.390438	0.381551	0.378378	0.367	0.347349	0.392481	0.383769	0.369723	0.392724	0.379562	0.389975	0.385106	0.421162	0.426696	0.386335	0.387382	0.381188	0.406103	0.395881	0.386493	0.423776	0.409156	0.396802	0.379775	0.380359	0.365635	0.415335	0.396341	0.423676
	21-30 years	0.219626	0.175926	0.183	0.259036	0.241036	0.232704	0.181982	0.196	0.166362	0.209023	0.177442	0.164483	0.24347	0.214923	0.193713	0.246809	0.19917	0.205689	0.220497	0.177476	0.185025	0.219875	0.187643	0.183889	0.230769	0.224607	0.222384	0.212734	0.204988	0.192182	0.236422	0.234756	0.208723
	31+ years	0.116822	0.101852	0.0805687	0.150602	0.167331	0.138365	0.104505	0.095986	0.0822669	0.0691729	0.0715268	0.0494905	0.147388	0.137875	0.123195	0.161702	0.139004	0.113786	0.0944099	0.0919811	0.0829208	0.0946792	0.0900076	0.081367	0.148252	0.147353	0.127907	0.137079	0.120811	0.112378	0.111821	0.10061	0.0560748
	Corresponding Authors of Published Manuscripts by Career Stage and Subject Area, 2021-2023
		Analytical			Biological & Medicinal			Chemical Engineering			Environmental			General			Inorganic			Materials			Nanoscience			Organic			Physical & Theoretical			Polymers & Macromolecules
	Time Since Doctorate	2021	2022	2023	2021	2022	2023	2021	2022	2023	2021	2022	2023	2021	2022	2023	2021	2022	2023	2021	2022	2023	2021	2022	2023	2021	2022	2023	2021	2022	2023	2021	2022	2023
	0-10 years	0.186869	0.232877	0.348718	0.114815	0.122581	0.210526	0.213389	0.215909	0.368217	0.245902	0.268041	0.38189	0.155606	0.246468	0.257042	0.159091	0.173285	0.185039	0.192671	0.286797	0.267966	0.170034	0.273734	0.262774	0.149644	0.18267	0.218605	0.165926	0.234584	0.25	0.15	0.221622	0.202381
	11-20 years	0.39899	0.424658	0.317949	0.388889	0.412903	0.350877	0.414226	0.42803	0.364341	0.409836	0.408935	0.34252	0.407323	0.368917	0.387324	0.409091	0.389892	0.429134	0.434988	0.402597	0.404385	0.456229	0.397152	0.405109	0.4038	0.423888	0.395349	0.386667	0.387399	0.383	0.433333	0.394595	0.464286
	21-30 years	0.252525	0.200913	0.210256	0.307407	0.280645	0.273684	0.242678	0.193182	0.189922	0.254098	0.243986	0.212598	0.256293	0.216641	0.205986	0.253788	0.267148	0.240157	0.263593	0.214286	0.213155	0.260943	0.218354	0.218978	0.258907	0.229508	0.251163	0.271111	0.22252	0.218	0.294444	0.286486	0.255952
	31+ years	0.161616	0.141553	0.123077	0.188889	0.183871	0.164912	0.129707	0.162879	0.0775194	0.0901639	0.0790378	0.0629921	0.180778	0.167975	0.149648	0.17803	0.169675	0.145669	0.108747	0.0963203	0.114495	0.112795	0.110759	0.113139	0.187648	0.163934	0.134884	0.176296	0.155496	0.149148	0.122222	0.0972973	0.077381
	Reviewers Completing Reviews by Career Stage and Subject Area, 2021-2023
		Analytical			Biological & Medicinal			Chemical Engineering			Environmental			General			Inorganic			Materials			Nanoscience			Organic			Physical & Theoretical			Polymers & Macromolecules
	Time Since Doctorate	2021	2022	2023	2021	2022	2023	2021	2022	2023	2021	2022	2023	2021	2022	2023	2021	2022	2023	2021	2022	2023	2021	2022	2023	2021	2022	2023	2021	2022	2023	2021	2022	2023
	0-10 years	0.225508	0.236697	0.27027	0.130326	0.163876	0.151934	0.229381	0.232234	0.279337	0.226136	0.267947	0.294451	0.169092	0.197361	0.205302	0.165653	0.155725	0.193498	0.236307	0.271739	0.283871	0.216054	0.250819	0.259759	0.122677	0.168099	0.170958	0.167506	0.197864	0.217189	0.167421	0.199095	0.209524
	11-20 years	0.380776	0.352294	0.368726	0.359649	0.337321	0.383	0.373711	0.374365	0.385204	0.357955	0.34277	0.353341	0.365211	0.374325	0.380395	0.367781	0.374046	0.385449	0.371414	0.382905	0.387634	0.385953	0.390308	0.399574	0.360595	0.34384	0.364573	0.359572	0.373116	0.391	0.404977	0.420814	0.390476
	21-30 years	0.225508	0.234862	0.222008	0.273183	0.267	0.241713	0.23067	0.248731	0.219388	0.243182	0.244692	0.232163	0.252945	0.238752	0.236745	0.275076	0.261069	0.243034	0.238915	0.218874	0.210753	0.237458	0.231827	0.220724	0.263941	0.254059	0.258	0.258816	0.249372	0.230513	0.271493	0.242081	0.264286
	31+ years	0.168207	0.176147	0.138996	0.236842	0.232	0.223	0.166237	0.14467	0.116071	0.172727	0.14459	0.120045	0.212751	0.189562	0.177559	0.191489	0.20916	0.178019	0.153365	0.127	0.117742	0.160535	0.127046	0.119943	0.252788	0.233	0.206	0.214106	0.179648	0.161	0.156109	0.138009	0.135714
